# Supplementary material
Source: PubMed Central journal article supplement (PMC6692877)
Supplement: en.2018-00040.sf1.pdf [file en.2018-00040.sf1.pdf]

## Supplementary Figure 1

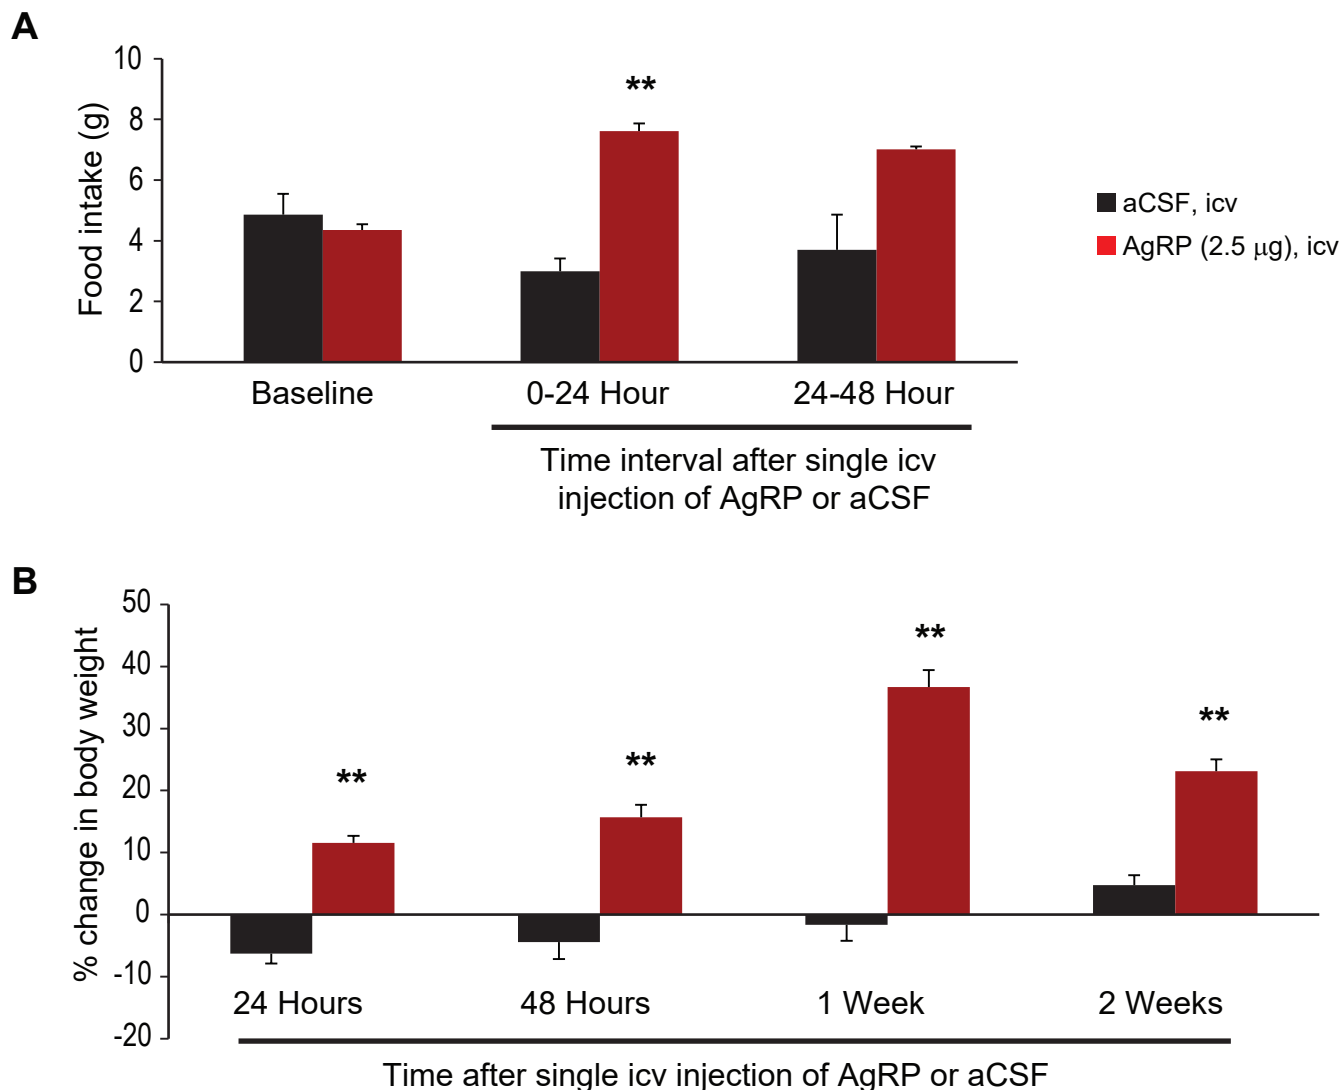

### Supplementary Figure 1: A single injection of AgRP peptide into the brain leads to sustained weight gain.

One single injection of 2.5 μg of mouse AgRP peptide (82-131 amide, Phoenix Pharmaceutical, Inc) into the lateral ventricle of *Agrp*<sup>-/-</sup> mice via guide cannula resulted in increased feeding (A), and sustained weight gain (B). n=4-6 per group. \*\* P<0.01 compared between AgRP and aCSF group by two-way ANOVA with repeated measures.

## Supplementary Figure 2

BODIPY (neural lipids) DAPI (nuclei)

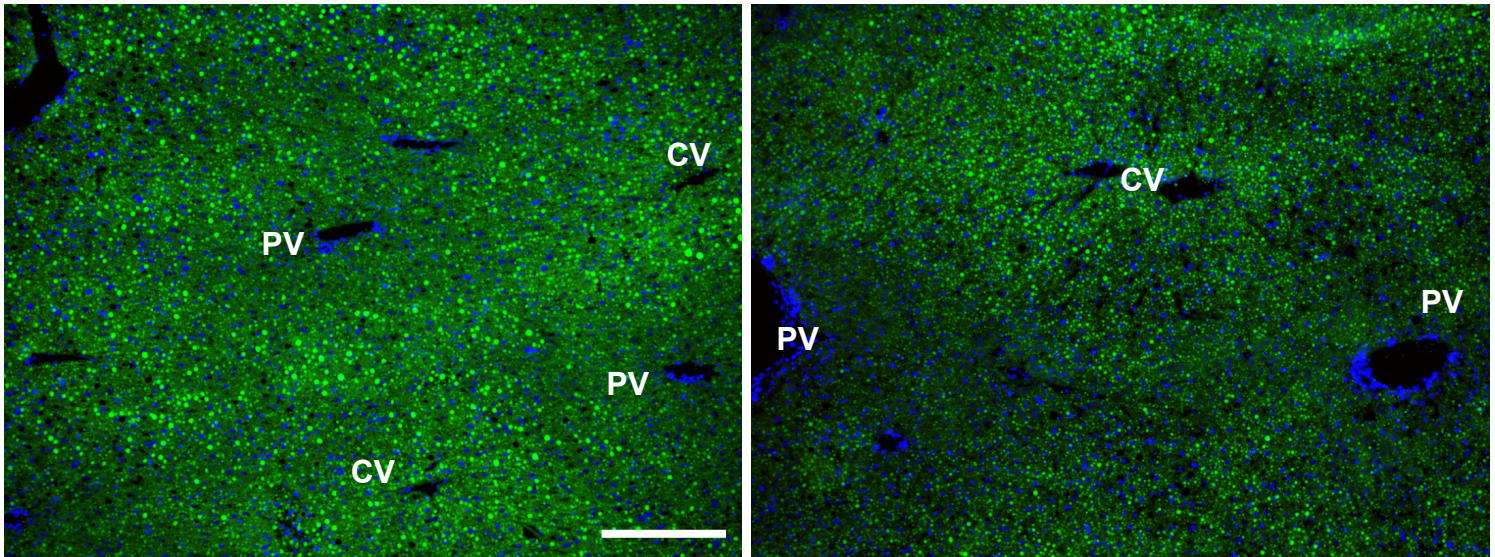

ObOb (4-week old)

DKO (4-week old)

### Supplementary Figure 2: Absence of AgRP function in 4-week-old prediabetic leptin-deficient mice alters their zonal distribution in the liver lobules.

A representative image showing lipid sparing around the periportal regions of 4-week-old ObOb (*Lep<sup>ob/ob</sup>, Agrp<sup>+/+</sup>*; or *Lep<sup>ob/ob</sup>, Agrp<sup>+/-</sup>*) and DKO (*Lep<sup>ob/ob</sup>, Agrp<sup>-/-</sup>*) mice. PV: portal vein. CV: central vein. Scale bar: 200  $\mu$ m.

# Supplementary Figure 3

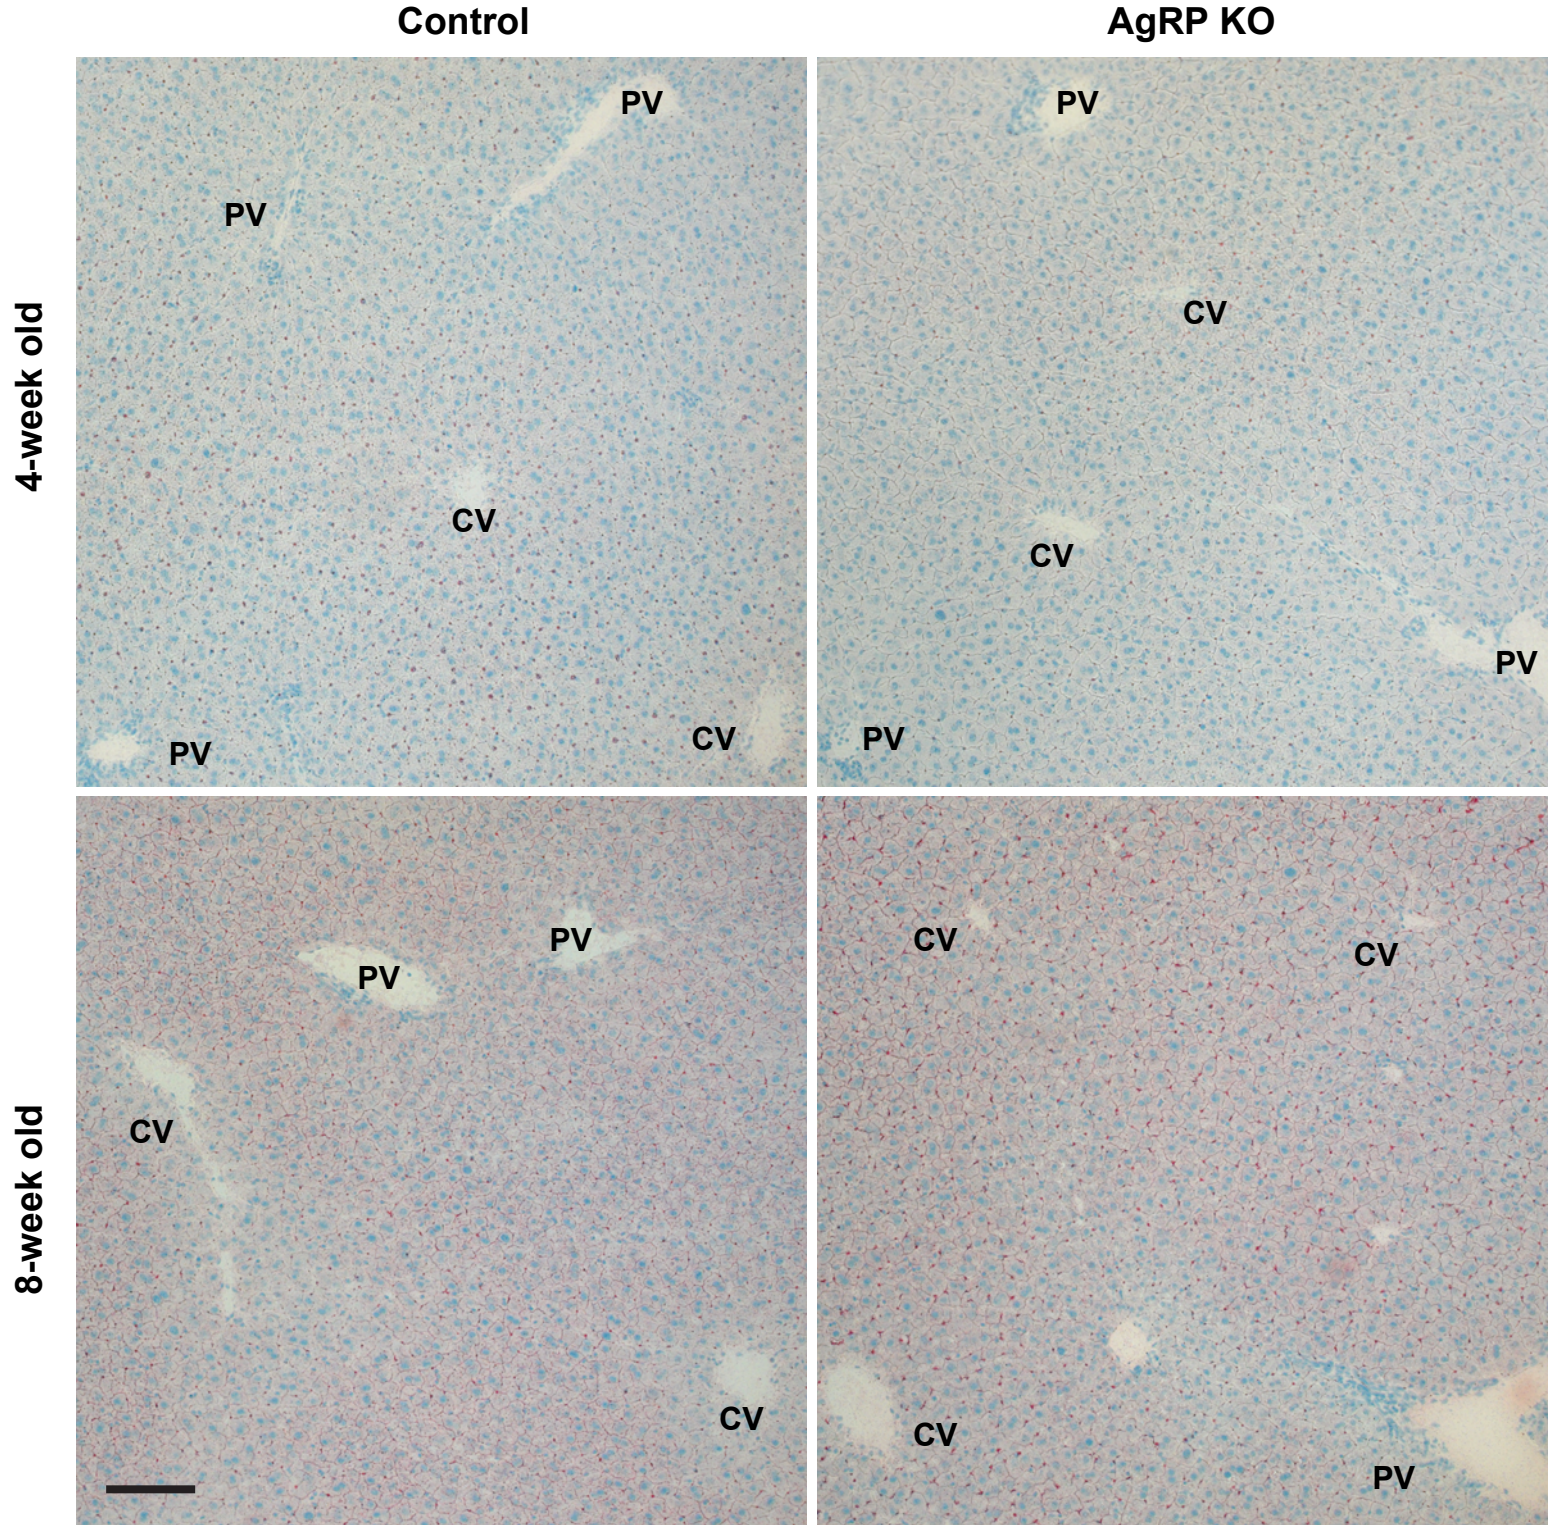

**Oil-Red-O (neural lipids) Hematoxylin (nuclei)**

**Supplementary Figure 3: Abundance and distribution of neutral lipids in control and AgRP-deficient livers.** Representative images showing Oil-red-O staining (red) in control (*Agrp<sup>+/+</sup>*, *Agrp<sup>-/-</sup>*) and AgRP-deficient mice. Nuclei were counter-stained with hematoxylin (blue). PV: portal vein. CV: central vein. Scale bar: 200  $\mu$ m.

## Supplementary Figure 4

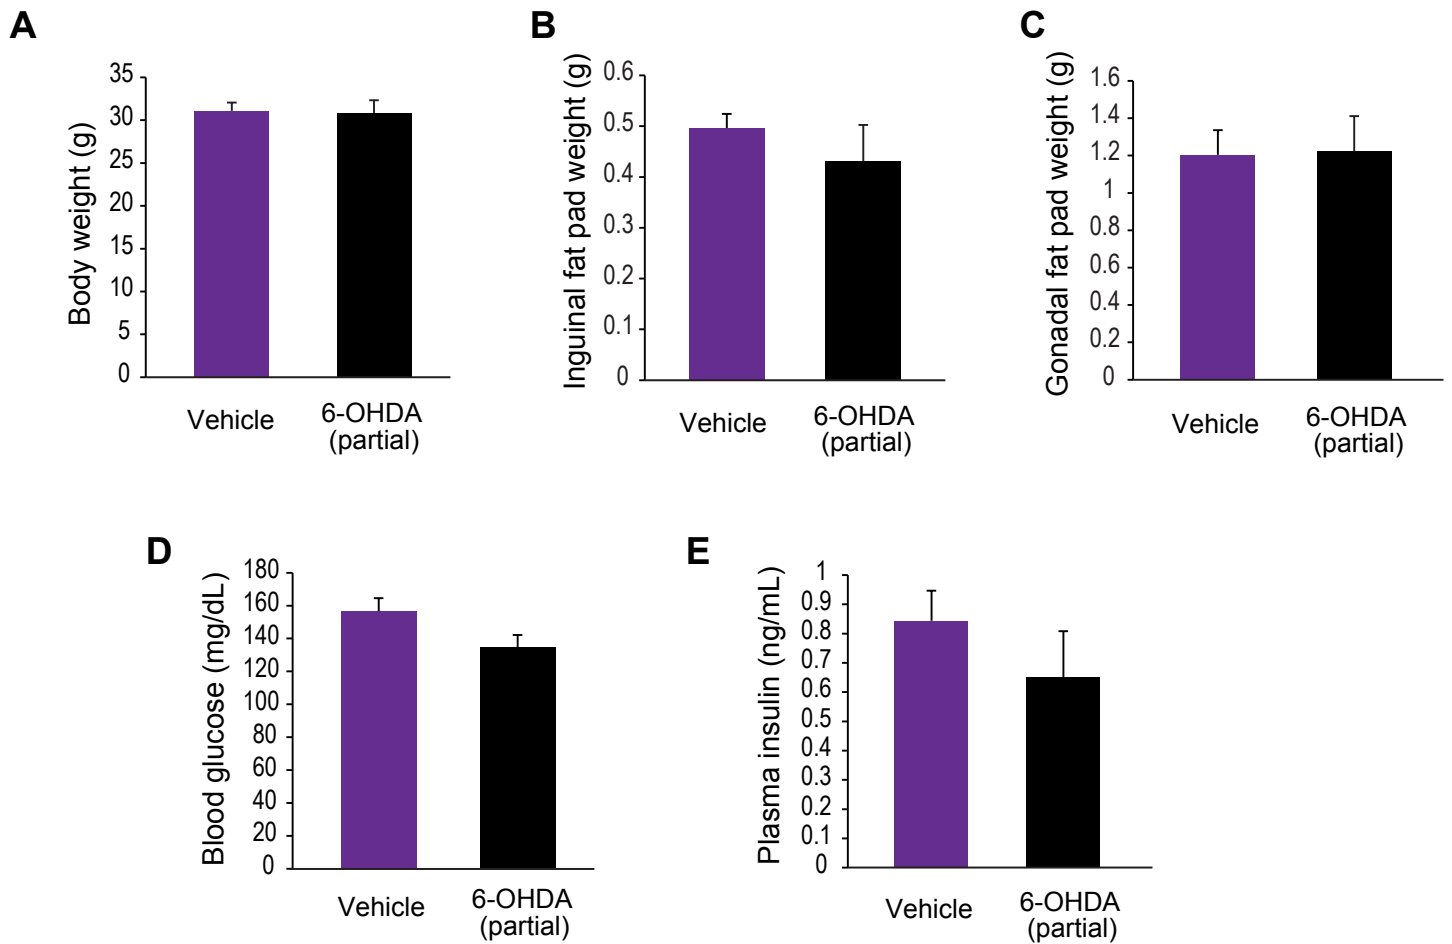

**Supplementary Figure 4: Terminal body weight, blood glucose and insulin levels in mice 3 weeks after 6-OHDA or vehicle treatment .** Weight-matched 11-14 week-old male B6 mice were treated with 6-OHDA or vehicle (n=7 per group). Mice were then placed on a high-fat diets for 3 weeks, after which tissues were collected. **(A)** terminal body weight; **(B-C)** fat pad weights; **(D-E)** fasting (6h) blood glucose and insulin levels.
